# Supplementary material for: Extensive transcriptomic study emphasizes importance of vesicular transport in C9orf72 expansion carriers
Source: Springer Nature journal article supplement (doi:10.1186/s40478-019-0797-0), 2019-10-08

**Electronic Supplementary Material**

**Extensive transcriptomic study emphasizes importance of vesicular transport in *C9orf72* expansion carriers**

**Authors:** Dennis W. Dickson, Matthew C. Baker, Jazmyne L. Jackson, Mariely DeJesus-Hernandez, NiCole A. Finch, Shulan Tian, Michael G. Heckman, Cyril Pottier, Tania F. Gendron, Melissa E. Murray, Yingxue Ren, Joseph S. Reddy, Neill R. Graff-Radford, Bradley F. Boeve, Ronald C. Petersen, David S. Knopman, Keith A. Josephs, Leonard Petrucelli, Björn Oskarsson, John W. Sheppard, Yan W. Asmann, Rosa Rademakers, and Marka van Blitterswijk

**Corresponding authors:** Marka van Blitterswijk, MD, PhD, Department of Neuroscience, Mayo Clinic, 4500 San Pablo Road, Jacksonville, FL 32224, USA. Telephone number: +1 904 953 2226. Fax number: +1 904 953 7370. Email: VanBlitterswijk.Marka@mayo.edu; Rosa Rademakers, PhD, Department of Neuroscience, Mayo Clinic, 4500 San Pablo Road, Jacksonville, FL 32224, USA. Telephone number: +1 904 953 6279. Fax number: +1 904 953 7370. Email: Rademakers.Rosa@mayo.edu.

**Contents:** Additional file 1: Figure S1–S6

## Figure Legends

**Figure S1** **a** Module-trait relationships are presented for patients with an expanded *C9orf72* repeat and patients without this repeat (C9Plus vs. C9Minus). **b** For patients with an expansion and control subjects (C9Plus vs. Control), module-trait relationships are plotted. These plots are generated with weighted gene co-expression network analysis (WGCNA) to find groups of genes that go up (*red*) or down (*blue*) together. A unique color has been assigned to each of these groups, also called a module. Correlations and p-values are shown for variables of interest, including disease group (C9Plus, C9Minus, and/or Control; *arrow*), neurons, microglia, astrocytes, oligodendrocytes, endothelial cells, RNA integrity number (RIN), age at death, sex, and plate. The strongest correlations (*brightest colors*) are observed for cell types. Notably, both module-trait relationship plots are based on residuals obtained without adjustment for cell-type-specific markers.

**Figure S2.** **a** With adjustment for cell-type-specific markers, a cluster dendrogram is shown for *C9orf72* expansion carriers and control subjects. **b** For the same comparison, a cluster dendrogram is displayed without adjustment for cell-type-specific markers. The branches in these dendrograms correspond to specific modules. A unique color has been assigned to each of these modules. Additionally, variables of interest are included, such as the disease group, neurons, microglia, astrocytes, oligodendrocytes, endothelial cells, RNA integrity number (RIN), age at death, sex, and plate. High levels are shown in *red* and low levels in *blue*. After adjustment, no striking differences are observed based on cell type; without adjustment, however, modules appear to be associated with certain cell types (e.g., turquoise and neurons).

**Figure S3.** **a** For patients harboring a *C9orf72* repeat expansion and those without this expansion (C9Plus vs. C9Minus; module membership > 0.6 and significance < 1.0E-05), a gene network is displayed. **b** A gene network is visualized when examining expansion carriers and controls (C9Plus vs. Control; module membership > 0.6 and significance < 1.0E-05). In these network plots, the connectivity of each gene is represented by the *size* of its node, the module to which it has been assigned by its *color*, and the strength of the correlation by the *thickness* of its edges; the *C9orf72* gene is denoted by an *arrow*. Of note, the plots in this figure have been generated without adjustment for cell-type-specific markers.

**Figure S4 a-d** Trends are displayed for patients carrying a *C9orf72* repeat expansion. **a** The first plot shows *VEGFA* and age at onset. **b** *CDKL1* and *C9orf72* expansion size are shown in the second plot. **c** The third plot displays *EEF2K*

and poly(GP) levels. In these three plots, the *solid blue line* denotes the linear regression line, while each individual is represented by a *solid dark grey circle*. **d** The last plot shows *SGSM3* levels and survival after onset, when comparing the bottom 50% (*solid salmon line*) to the top 50% (*solid turquoise line*). These plots have been created using residuals unadjusted for differences in cellular composition.

**Figure S5 a-h** The expression levels of *VEGFA*, *CDKL1*, *EEF2K*, and *SGSM3* are shown for all disease groups: patients with a *C9orf72* repeat expansion (C9Plus), patients without this expansion (C9Minus), and control subjects (Control), both with and without adjustment for cell-type-specific markers. For each box plot, the median is represented by a *solid black line*, and each box spans the interquartile range (IQR; 25<sup>th</sup> percentile to 75<sup>th</sup> percentile).

**Figure S6 a-h** This figure displays the correlation between our expression assays (relative expression) and RNA sequencing data (residuals). **a-b** The first two plots show correlations for *VEGFA*, either with or without adjustment for cell-type-specific markers. **c-d** The next two plots visualize correlations for *CDKL1*, both with and without adjustment for cellular composition. **e-f** *EEF2K* is displayed on the next plots, again with and without adjustment for surrogate markers. **g-h** The last two plots show correlations for *SGSM3* with and without adjustment for cellular composition. For each of these plots, the *solid blue line* denotes the linear regression line, while each individual is represented by a *solid dark grey circle*.

Figure S1

**a**

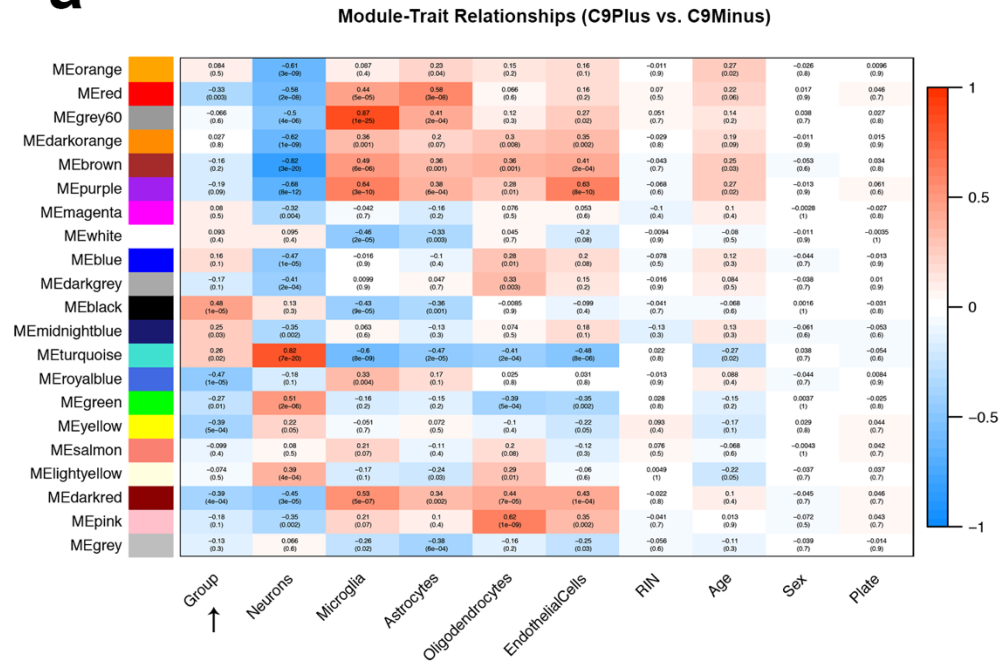

**b**

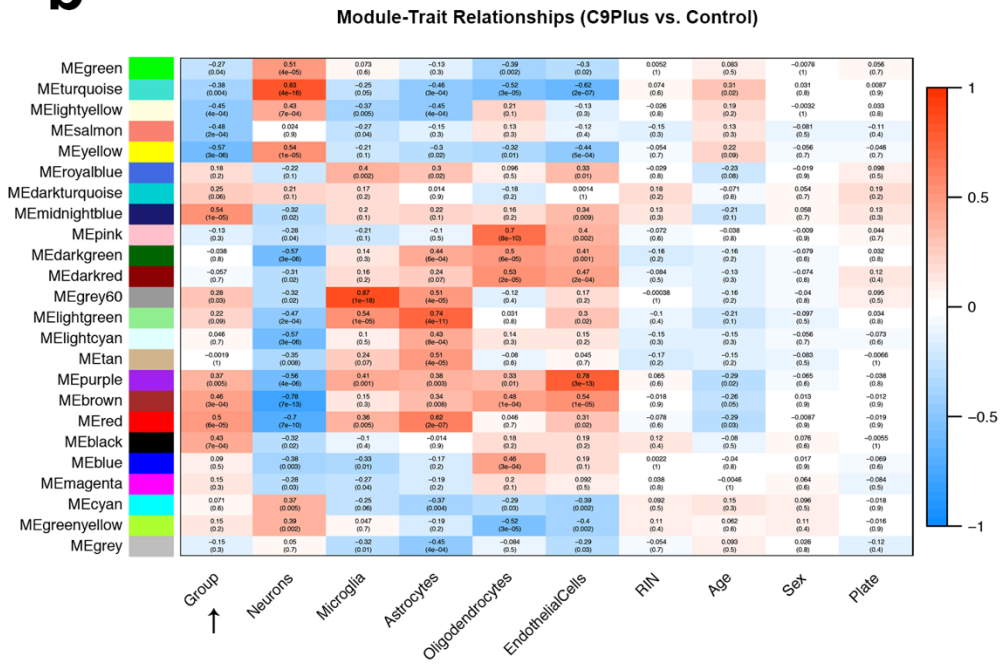

Figure S2

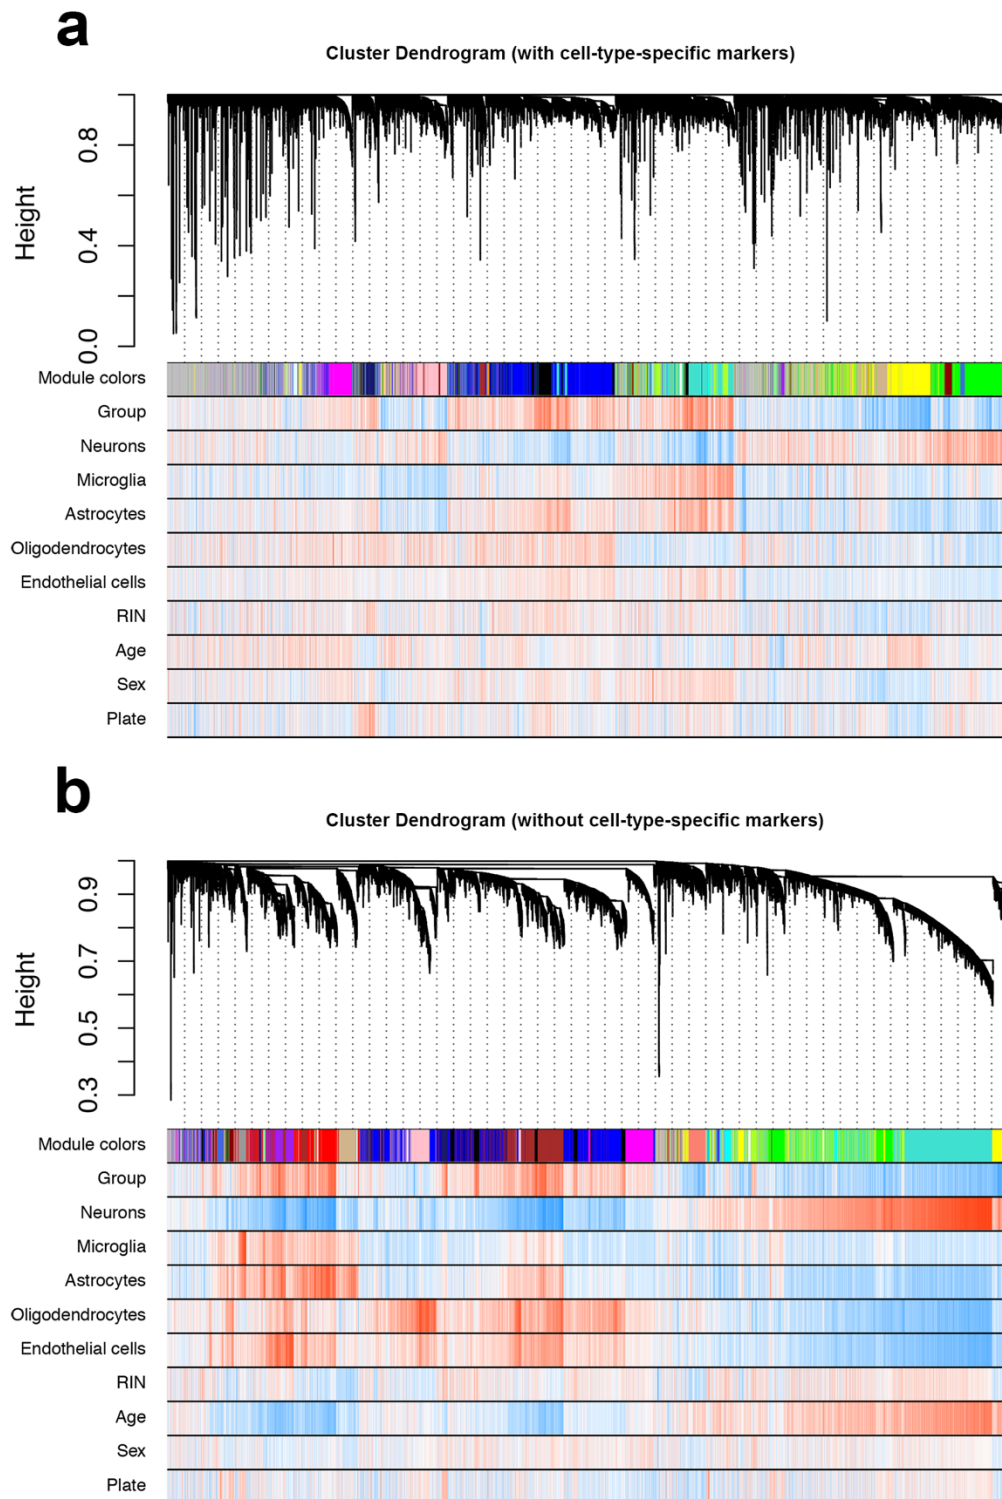

Figure S3

**a**

Gene Network (C9Plus vs. C9Minus)

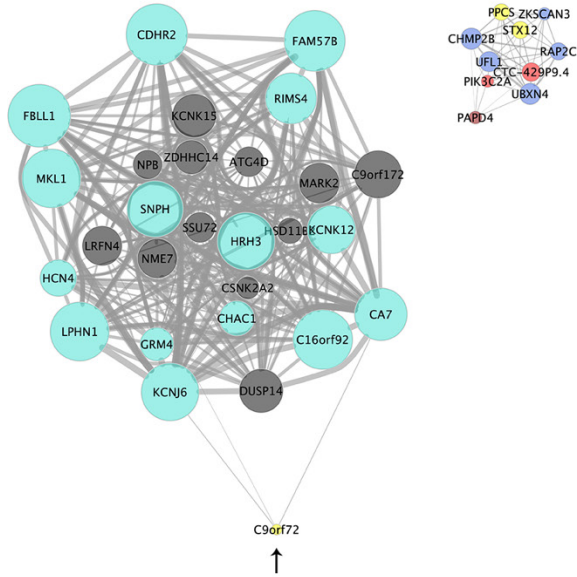

**b**

Gene Network (C9Plus vs. Control)

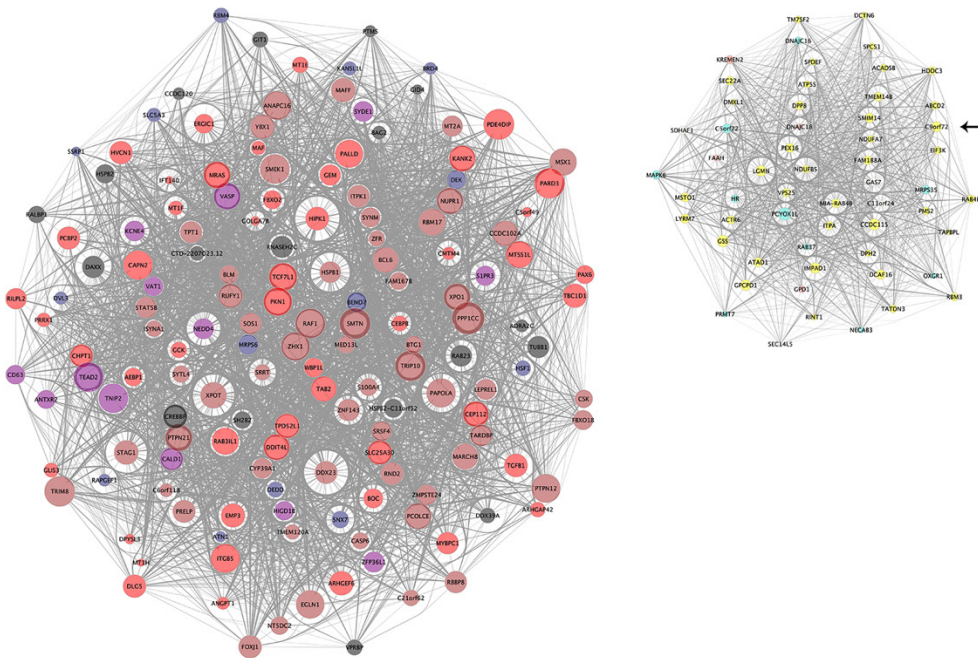

Figure S4

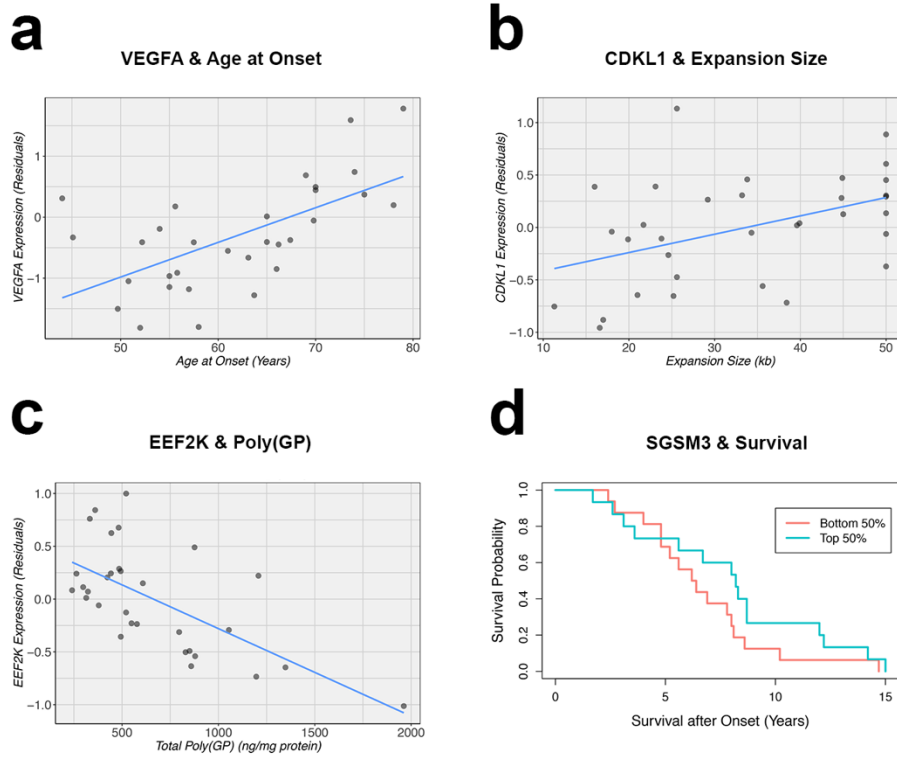

Figure S5

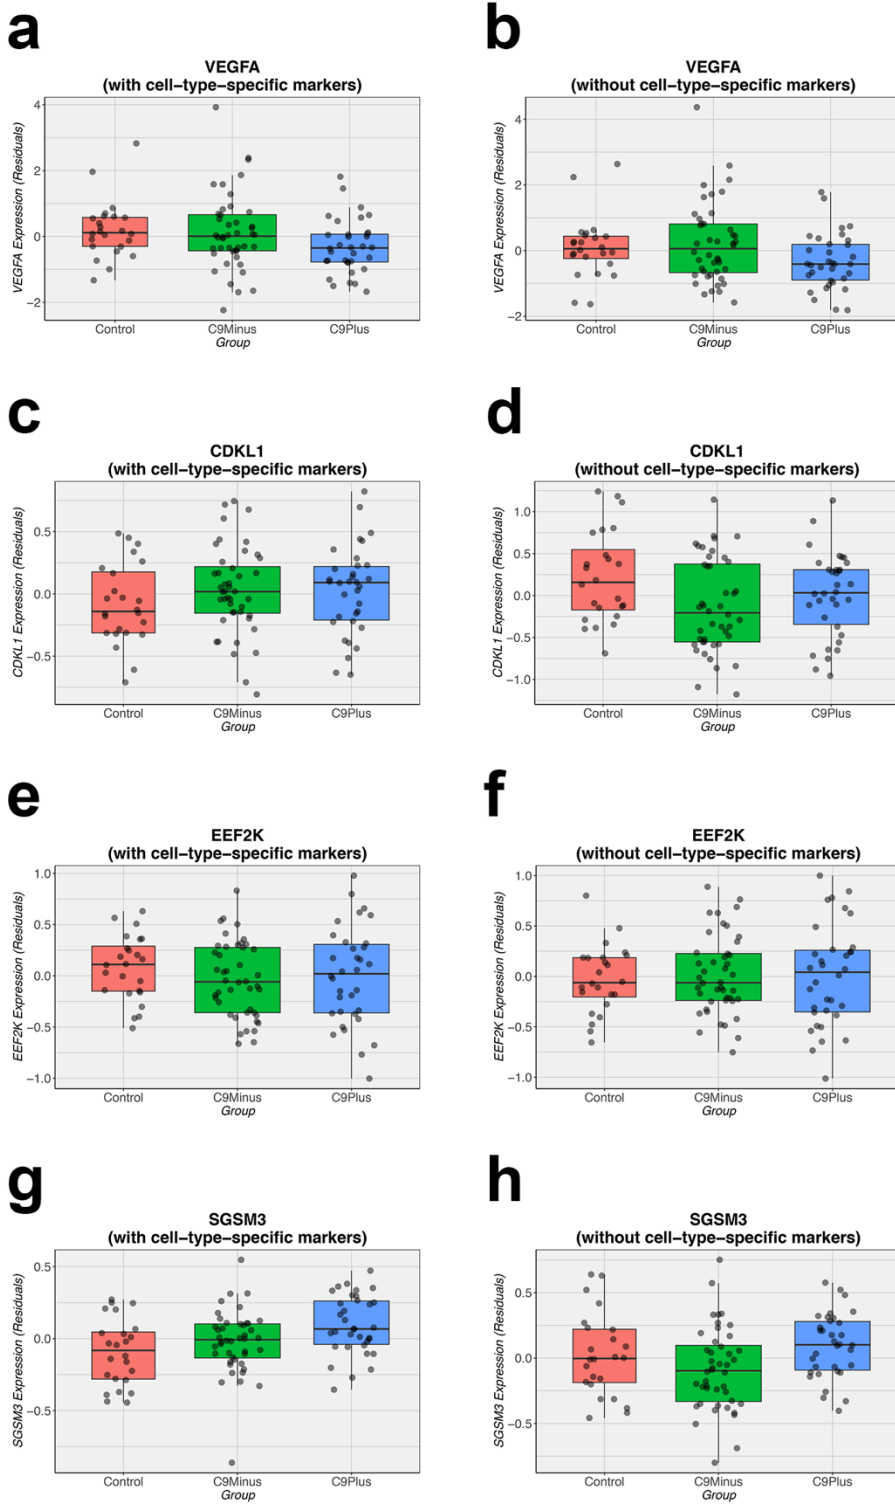



Figure S6

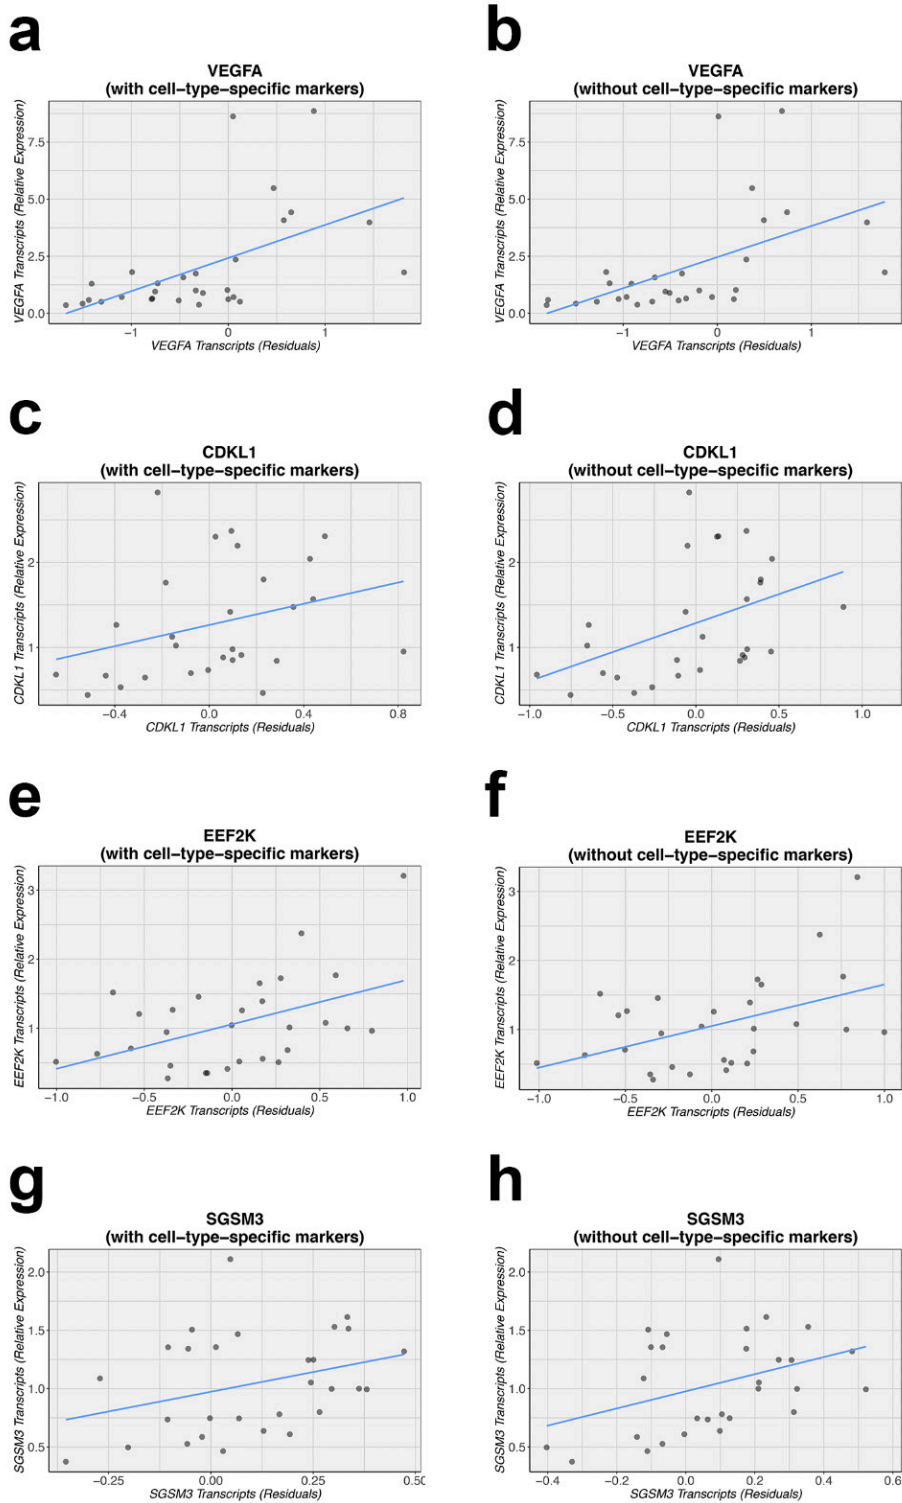

Supplement: MOESM1 [file 25666914]
